# Supplementary material for: Genome-wide identification of long non-coding RNA for Botrytis cinerea during infection to tomato (Solanum lycopersicum) leaves
Source: Research Square preprint supplement (doi:10.21203/rs.3.rs-4418367/v1), 2024-12-17
Supplement: Supplementary file 1 [file f8c96143b24ff3de5523384c.xlsx]

## Sheet: Table S1
Table S1 Information of RNA sequencing data used in this study.
Type of data	Library method	Sample name	Sample description	Reads length	Reads count	Mapping rates	Mapped reads	SRA_Run	Reference
Strand-specific RNA-Seq	poly(A) selection	Hy6h-1	6 h conidial germlings from liquid PDB cultures, biological replicate 1	2×150 bp	20108288	0.9607	19318032	SRR27341460	This study
Strand-specific RNA-Seq	poly(A) selection	Hy6h-2	6 h conidial germlings from liquid PDB cultures, biological replicate 2	2×150 bp	23814324	0.9697	23092750	SRR27341459	This study
Strand-specific RNA-Seq	poly(A) selection	Hy6h-3	6 h conidial germlings from liquid PDB cultures, biological replicate 3	2×150 bp	21764848	0.9735	21188080	SRR27341448	This study
Strand-specific RNA-Seq	poly(A) selection	Hyp12h-1	12 h conidial germlings from liquid PDB cultures, biological replicate 1	2×150 bp	25699372	0.9725	24992639	SRR27341447	This study
Strand-specific RNA-Seq	poly(A) selection	Hyp12h-2	12 h conidial germlings from liquid PDB cultures, biological replicate 2	2×150 bp	21723170	0.9739	21156195	SRR27341446	This study
Strand-specific RNA-Seq	poly(A) selection	Hyp12h-3	12 h conidial germlings from liquid PDB cultures, biological replicate 3	2×150 bp	21440262	0.9723	20846367	SRR27341445	This study
Strand-specific RNA-Seq	poly(A) selection	Hyp24h-1	24 h conidial germlings from liquid PDB cultures, biological replicate 1	2×150 bp	24643518	0.9708	23923927	SRR27341444	This study
Strand-specific RNA-Seq	poly(A) selection	Hyp24h-2	24 h conidial germlings from liquid PDB cultures, biological replicate 2	2×150 bp	24658466	0.9662	23825010	SRR27341443	This study
Strand-specific RNA-Seq	poly(A) selection	Hyp24h-3	24 h conidial germlings from liquid PDB cultures, biological replicate 3	2×150 bp	22068962	0.972	21451031	SRR27341442	This study
Strand-specific RNA-Seq	poly(A) selection	Hyp48h-1	48 h conidial germlings from liquid PDB cultures, biological replicate 1	2×150 bp	24404330	0.9699	23669760	SRR27341441	This study
Strand-specific RNA-Seq	poly(A) selection	Hyp48h-2	48 h conidial germlings from liquid PDB cultures, biological replicate 2	2×150 bp	19813686	0.9719	19256921	SRR27341458	This study
Strand-specific RNA-Seq	poly(A) selection	Hyp48h-3	48 h conidial germlings from liquid PDB cultures, biological replicate 3	2×150 bp	20193322	0.9657	19500691	SRR27341457	This study
Strand-specific RNA-Seq	poly(A) selection	Inf6h-1	Inoculated leaves of tomato of cultivar Moneymaker collected 6 h after inoculation, biological replicate 1	2×150 bp	56957092	0.4091	23301146	SRR27341456	This study
Strand-specific RNA-Seq	poly(A) selection	Inf6h-2	Inoculated leaves of tomato of cultivar Moneymaker collected 6 h after inoculation, biological replicate 2	2×150 bp	59362322	0.124	7360928	SRR27341455	This study
Strand-specific RNA-Seq	poly(A) selection	Inf12h-1	Inoculated leaves of tomato of cultivar Moneymaker collected 12 h after inoculation, biological replicate 1	2×150 bp	59047680	0.3371	19904973	SRR27341454	This study
Strand-specific RNA-Seq	poly(A) selection	Inf12h-2	Inoculated leaves of tomato of cultivar Moneymaker collected 12 h after inoculation, biological replicate 2	2×150 bp	56020380	0.4314	24167192	SRR27341453	This study
Strand-specific RNA-Seq	poly(A) selection	Inf24h-1	Inoculated leaves of tomato of cultivar Moneymaker collected 24 h after inoculation, biological replicate 1	2×150 bp	55443886	0.118	6542379	SRR27341452	This study
Strand-specific RNA-Seq	poly(A) selection	Inf24h-3	Inoculated leaves of tomato of cultivar Moneymaker collected 24 h after inoculation, biological replicate 2	2×150 bp	58542836	0.1828	10701630	SRR27341451	This study
Strand-specific RNA-Seq	poly(A) selection	Inf48h-1	Inoculated leaves of tomato of cultivar Moneymaker collected 48 h after inoculation, biological replicate 1	2×150 bp	57876956	0.0541	3131143	SRR27341450	This study
Strand-specific RNA-Seq	poly(A) selection	Inf48h-2	Inoculated leaves of tomato of cultivar Moneymaker collected 48 h after inoculation, biological replicate 2	2×150 bp	59391798	0.4851	28810961	SRR27341449	This study
Strand-specific sRNA-Seq	-	Hy16h-1	16 h conidial germlings from liquid PDB cultures, biological replicate 1	75 bp	5467365	0.8858	4.84299e+06	SRR8074930	Qin et al, 2023, Molecular Plant Pathology
Strand-specific sRNA-Seq	-	Hy16h-2	16 h conidial germlings from liquid PDB cultures, biological replicate 2	75 bp	9935939	0.8847	8.79033e+06	SRR8074931	Qin et al, 2023, Molecular Plant Pathology
Strand-specific sRNA-Seq	-	Inf12h-1	Inoculated leaves of tomato of cultivar Moneymaker collected 12 h after inoculation, biological replicate 1	75 bp	45573329	0.0045	205080	SRR8074941	Qin et al, 2023, Molecular Plant Pathology
Strand-specific sRNA-Seq	-	Inf12h-2	Inoculated leaves of tomato of cultivar Moneymaker collected 12 h after inoculation, biological replicate 2	75 bp	49823642	0.0047	234171	SRR8074948	Qin et al, 2023, Molecular Plant Pathology
Strand-specific sRNA-Seq	-	Inf12h-3	Inoculated leaves of tomato of cultivar Moneymaker collected 12 h after inoculation, biological replicate 3	75 bp	16643220	0.0044	73230.2	SRR8074949	Qin et al, 2023, Molecular Plant Pathology
Strand-specific sRNA-Seq	-	Inf16h-1	Inoculated leaves of tomato of cultivar Moneymaker collected 16 h after inoculation, biological replicate 1	75 bp	17420519	0.0044	76650.3	SRR8074937	Qin et al, 2023, Molecular Plant Pathology
Strand-specific sRNA-Seq	-	Inf16h-2	Inoculated leaves of tomato of cultivar Moneymaker collected 16 h after inoculation, biological replicate 2	75 bp	48729812	0.0039	190046	SRR8074938	Qin et al, 2023, Molecular Plant Pathology
Strand-specific sRNA-Seq	-	Inf16h-3	Inoculated leaves of tomato of cultivar Moneymaker collected 16 h after inoculation, biological replicate 3	75 bp	55749069	0.0037	206272	SRR8074939	Qin et al, 2023, Molecular Plant Pathology
Strand-specific sRNA-Seq	-	Inf24h-1	Inoculated leaves of tomato of cultivar Moneymaker collected 24 h after inoculation, biological replicate 1	75 bp	47715509	0.0112	534414	SRR8074935	Qin et al, 2023, Molecular Plant Pathology
Strand-specific sRNA-Seq	-	Inf24h-2	Inoculated leaves of tomato of cultivar Moneymaker collected 24 h after inoculation, biological replicate 2	75 bp	28828508	0.0137	394951	SRR8074936	Qin et al, 2023, Molecular Plant Pathology

## Sheet: Table S2
Table S2 Significantly up-regulated and down-regulated lncRNAs in the Inf6 h/Hyp6 h, Inf12 h/Hyp12 h, Inf24 h/Hyp24 h and Inf48 h/Hyp48 h.
ID	Up/Down	Stage
lncRNA.14364.1	Up	Inf6 h/Hyp6 h
lncRNA.15202.1	Up	Inf6 h/Hyp6 h
lncRNA.6687.1	Up	Inf6 h/Hyp6 h
lncRNA.15105.3	Up	Inf6 h/Hyp6 h
lncRNA.7333.1	Up	Inf6 h/Hyp6 h
lncRNA.11214.1	Up	Inf6 h/Hyp6 h
lncRNA.15061.4	Up	Inf6 h/Hyp6 h
lncRNA.14364.3	Up	Inf6 h/Hyp6 h
lncRNA.7412.2	Up	Inf6 h/Hyp6 h
lncRNA.6940.1	Up	Inf6 h/Hyp6 h
lncRNA.12841.3	Up	Inf6 h/Hyp6 h
lncRNA.4342.1	Up	Inf6 h/Hyp6 h
lncRNA.9233.1	Up	Inf6 h/Hyp6 h
lncRNA.12461.1	Up	Inf6 h/Hyp6 h
lncRNA.16219.1	Up	Inf6 h/Hyp6 h
lncRNA.13049.1	Down	Inf6 h/Hyp6 h
lncRNA.10475.1	Down	Inf6 h/Hyp6 h
lncRNA.13049.2	Down	Inf6 h/Hyp6 h
lncRNA.5630.2	Down	Inf6 h/Hyp6 h
lncRNA.7637.4	Down	Inf6 h/Hyp6 h
lncRNA.12666.2	Down	Inf6 h/Hyp6 h
lncRNA.5385.1	Down	Inf6 h/Hyp6 h
lncRNA.1752.1	Down	Inf6 h/Hyp6 h
lncRNA.13046.6	Down	Inf6 h/Hyp6 h
lncRNA.6055.2	Down	Inf6 h/Hyp6 h
lncRNA.14889.1	Down	Inf6 h/Hyp6 h
lncRNA.6008.2	Down	Inf6 h/Hyp6 h
lncRNA.13046.8	Down	Inf6 h/Hyp6 h
lncRNA.14800.2	Down	Inf6 h/Hyp6 h
lncRNA.10478.3	Down	Inf6 h/Hyp6 h
lncRNA.12258.2	Down	Inf6 h/Hyp6 h
lncRNA.7752.1	Down	Inf6 h/Hyp6 h
lncRNA.2478.3	Down	Inf6 h/Hyp6 h
lncRNA.297.1	Up	Inf12 h/Hyp12 h
lncRNA.973.4	Up	Inf12 h/Hyp12 h
lncRNA.2983.2	Up	Inf12 h/Hyp12 h
lncRNA.3031.2	Up	Inf12 h/Hyp12 h
lncRNA.3035.1	Up	Inf12 h/Hyp12 h
lncRNA.3424.1	Up	Inf12 h/Hyp12 h
lncRNA.3425.1	Up	Inf12 h/Hyp12 h
lncRNA.4201.1	Up	Inf12 h/Hyp12 h
lncRNA.5412.1	Up	Inf12 h/Hyp12 h
lncRNA.5607.2	Up	Inf12 h/Hyp12 h
lncRNA.5818.2	Up	Inf12 h/Hyp12 h
lncRNA.5919.1	Up	Inf12 h/Hyp12 h
lncRNA.6272.6	Up	Inf12 h/Hyp12 h
lncRNA.6687.1	Up	Inf12 h/Hyp12 h
lncRNA.6826.1	Up	Inf12 h/Hyp12 h
lncRNA.6940.1	Up	Inf12 h/Hyp12 h
lncRNA.7394.2	Up	Inf12 h/Hyp12 h
lncRNA.7412.3	Up	Inf12 h/Hyp12 h
lncRNA.7848.2	Up	Inf12 h/Hyp12 h
lncRNA.8113.3	Up	Inf12 h/Hyp12 h
lncRNA.9233.1	Up	Inf12 h/Hyp12 h
lncRNA.10599.1	Up	Inf12 h/Hyp12 h
lncRNA.10789.1	Up	Inf12 h/Hyp12 h
lncRNA.11214.1	Up	Inf12 h/Hyp12 h
lncRNA.11473.5	Up	Inf12 h/Hyp12 h
lncRNA.11486.1	Up	Inf12 h/Hyp12 h
lncRNA.12532.3	Up	Inf12 h/Hyp12 h
lncRNA.12841.3	Up	Inf12 h/Hyp12 h
lncRNA.14364.1	Up	Inf12 h/Hyp12 h
lncRNA.14364.3	Up	Inf12 h/Hyp12 h
lncRNA.15202.1	Up	Inf12 h/Hyp12 h
lncRNA.15473.2	Up	Inf12 h/Hyp12 h
lncRNA.15473.4	Up	Inf12 h/Hyp12 h
lncRNA.15761.2	Up	Inf12 h/Hyp12 h
lncRNA.16291.1	Up	Inf12 h/Hyp12 h
lncRNA.16536.2	Up	Inf12 h/Hyp12 h
lncRNA.17104.1	Up	Inf12 h/Hyp12 h
lncRNA.79.1	Down	Inf12 h/Hyp12 h
lncRNA.79.3	Down	Inf12 h/Hyp12 h
lncRNA.739.1	Down	Inf12 h/Hyp12 h
lncRNA.1084.1	Down	Inf12 h/Hyp12 h
lncRNA.1226.1	Down	Inf12 h/Hyp12 h
lncRNA.1612.1	Down	Inf12 h/Hyp12 h
lncRNA.1752.1	Down	Inf12 h/Hyp12 h
lncRNA.1752.2	Down	Inf12 h/Hyp12 h
lncRNA.2166.1	Down	Inf12 h/Hyp12 h
lncRNA.2605.3	Down	Inf12 h/Hyp12 h
lncRNA.2605.7	Down	Inf12 h/Hyp12 h
lncRNA.2790.1	Down	Inf12 h/Hyp12 h
lncRNA.2862.1	Down	Inf12 h/Hyp12 h
lncRNA.2995.3	Down	Inf12 h/Hyp12 h
lncRNA.3641.2	Down	Inf12 h/Hyp12 h
lncRNA.3672.1	Down	Inf12 h/Hyp12 h
lncRNA.4201.8	Down	Inf12 h/Hyp12 h
lncRNA.4922.1	Down	Inf12 h/Hyp12 h
lncRNA.4922.7	Down	Inf12 h/Hyp12 h
lncRNA.5199.2	Down	Inf12 h/Hyp12 h
lncRNA.5385.1	Down	Inf12 h/Hyp12 h
lncRNA.5979.1	Down	Inf12 h/Hyp12 h
lncRNA.6008.2	Down	Inf12 h/Hyp12 h
lncRNA.6008.4	Down	Inf12 h/Hyp12 h
lncRNA.6011.1	Down	Inf12 h/Hyp12 h
lncRNA.6027.1	Down	Inf12 h/Hyp12 h
lncRNA.6026.1	Down	Inf12 h/Hyp12 h
lncRNA.6055.2	Down	Inf12 h/Hyp12 h
lncRNA.6097.3	Down	Inf12 h/Hyp12 h
lncRNA.6105.1	Down	Inf12 h/Hyp12 h
lncRNA.6273.1	Down	Inf12 h/Hyp12 h
lncRNA.6305.2	Down	Inf12 h/Hyp12 h
lncRNA.6581.4	Down	Inf12 h/Hyp12 h
lncRNA.6734.1	Down	Inf12 h/Hyp12 h
lncRNA.6820.1	Down	Inf12 h/Hyp12 h
lncRNA.7323.1	Down	Inf12 h/Hyp12 h
lncRNA.7637.9	Down	Inf12 h/Hyp12 h
lncRNA.7752.2	Down	Inf12 h/Hyp12 h
lncRNA.7789.1	Down	Inf12 h/Hyp12 h
lncRNA.8113.2	Down	Inf12 h/Hyp12 h
lncRNA.8316.2	Down	Inf12 h/Hyp12 h
lncRNA.8339.1	Down	Inf12 h/Hyp12 h
lncRNA.8619.1	Down	Inf12 h/Hyp12 h
lncRNA.8783.3	Down	Inf12 h/Hyp12 h
lncRNA.9730.4	Down	Inf12 h/Hyp12 h
lncRNA.9756.1	Down	Inf12 h/Hyp12 h
lncRNA.9887.1	Down	Inf12 h/Hyp12 h
lncRNA.10475.1	Down	Inf12 h/Hyp12 h
lncRNA.10478.1	Down	Inf12 h/Hyp12 h
lncRNA.10472.1	Down	Inf12 h/Hyp12 h
lncRNA.10686.1	Down	Inf12 h/Hyp12 h
lncRNA.11011.2	Down	Inf12 h/Hyp12 h
lncRNA.11300.1	Down	Inf12 h/Hyp12 h
lncRNA.12258.2	Down	Inf12 h/Hyp12 h
lncRNA.12532.1	Down	Inf12 h/Hyp12 h
lncRNA.12666.2	Down	Inf12 h/Hyp12 h
lncRNA.13009.1	Down	Inf12 h/Hyp12 h
lncRNA.13046.5	Down	Inf12 h/Hyp12 h
lncRNA.13049.1	Down	Inf12 h/Hyp12 h
lncRNA.13049.2	Down	Inf12 h/Hyp12 h
lncRNA.13148.1	Down	Inf12 h/Hyp12 h
lncRNA.13149.1	Down	Inf12 h/Hyp12 h
lncRNA.13747.1	Down	Inf12 h/Hyp12 h
lncRNA.13904.1	Down	Inf12 h/Hyp12 h
lncRNA.14278.1	Down	Inf12 h/Hyp12 h
lncRNA.14627.1	Down	Inf12 h/Hyp12 h
lncRNA.14800.1	Down	Inf12 h/Hyp12 h
lncRNA.14800.2	Down	Inf12 h/Hyp12 h
lncRNA.14982.1	Down	Inf12 h/Hyp12 h
lncRNA.15106.3	Down	Inf12 h/Hyp12 h
lncRNA.15157.3	Down	Inf12 h/Hyp12 h
lncRNA.15157.5	Down	Inf12 h/Hyp12 h
lncRNA.15157.6	Down	Inf12 h/Hyp12 h
lncRNA.15157.7	Down	Inf12 h/Hyp12 h
lncRNA.15157.8	Down	Inf12 h/Hyp12 h
lncRNA.15268.2	Down	Inf12 h/Hyp12 h
lncRNA.15268.7	Down	Inf12 h/Hyp12 h
lncRNA.15617.1	Down	Inf12 h/Hyp12 h
lncRNA.15618.1	Down	Inf12 h/Hyp12 h
lncRNA.15620.1	Down	Inf12 h/Hyp12 h
lncRNA.15632.2	Down	Inf12 h/Hyp12 h
lncRNA.15696.2	Down	Inf12 h/Hyp12 h
lncRNA.15696.4	Down	Inf12 h/Hyp12 h
lncRNA.15781.1	Down	Inf12 h/Hyp12 h
lncRNA.16117.1	Down	Inf12 h/Hyp12 h
lncRNA.16540.1	Down	Inf12 h/Hyp12 h
lncRNA.16705.2	Down	Inf12 h/Hyp12 h
lncRNA.16782.1	Down	Inf12 h/Hyp12 h
lncRNA.973.4	Up	Inf24 h/Hyp24 h
lncRNA.3146.1	Up	Inf24 h/Hyp24 h
lncRNA.3424.1	Up	Inf24 h/Hyp24 h
lncRNA.3425.1	Up	Inf24 h/Hyp24 h
lncRNA.4489.2	Up	Inf24 h/Hyp24 h
lncRNA.5485.3	Up	Inf24 h/Hyp24 h
lncRNA.5607.2	Up	Inf24 h/Hyp24 h
lncRNA.5818.2	Up	Inf24 h/Hyp24 h
lncRNA.5919.1	Up	Inf24 h/Hyp24 h
lncRNA.6425.2	Up	Inf24 h/Hyp24 h
lncRNA.6687.1	Up	Inf24 h/Hyp24 h
lncRNA.6713.1	Up	Inf24 h/Hyp24 h
lncRNA.6940.1	Up	Inf24 h/Hyp24 h
lncRNA.7167.1	Up	Inf24 h/Hyp24 h
lncRNA.7412.5	Up	Inf24 h/Hyp24 h
lncRNA.7752.3	Up	Inf24 h/Hyp24 h
lncRNA.10599.1	Up	Inf24 h/Hyp24 h
lncRNA.11214.1	Up	Inf24 h/Hyp24 h
lncRNA.11486.1	Up	Inf24 h/Hyp24 h
lncRNA.12532.3	Up	Inf24 h/Hyp24 h
lncRNA.12841.6	Up	Inf24 h/Hyp24 h
lncRNA.14364.3	Up	Inf24 h/Hyp24 h
lncRNA.15105.3	Up	Inf24 h/Hyp24 h
lncRNA.15202.1	Up	Inf24 h/Hyp24 h
lncRNA.15473.9	Up	Inf24 h/Hyp24 h
lncRNA.15588.2	Up	Inf24 h/Hyp24 h
lncRNA.15761.1	Up	Inf24 h/Hyp24 h
lncRNA.79.1	Down	Inf24 h/Hyp24 h
lncRNA.79.3	Down	Inf24 h/Hyp24 h
lncRNA.739.1	Down	Inf24 h/Hyp24 h
lncRNA.739.3	Down	Inf24 h/Hyp24 h
lncRNA.1084.1	Down	Inf24 h/Hyp24 h
lncRNA.1752.1	Down	Inf24 h/Hyp24 h
lncRNA.2566.1	Down	Inf24 h/Hyp24 h
lncRNA.2605.1	Down	Inf24 h/Hyp24 h
lncRNA.2790.1	Down	Inf24 h/Hyp24 h
lncRNA.3229.2	Down	Inf24 h/Hyp24 h
lncRNA.3641.2	Down	Inf24 h/Hyp24 h
lncRNA.3640.1	Down	Inf24 h/Hyp24 h
lncRNA.4452.3	Down	Inf24 h/Hyp24 h
lncRNA.4922.1	Down	Inf24 h/Hyp24 h
lncRNA.4939.5	Down	Inf24 h/Hyp24 h
lncRNA.5199.2	Down	Inf24 h/Hyp24 h
lncRNA.5385.1	Down	Inf24 h/Hyp24 h
lncRNA.5485.2	Down	Inf24 h/Hyp24 h
lncRNA.5979.1	Down	Inf24 h/Hyp24 h
lncRNA.6008.2	Down	Inf24 h/Hyp24 h
lncRNA.6008.4	Down	Inf24 h/Hyp24 h
lncRNA.6026.1	Down	Inf24 h/Hyp24 h
lncRNA.6055.2	Down	Inf24 h/Hyp24 h
lncRNA.6239.1	Down	Inf24 h/Hyp24 h
lncRNA.6273.1	Down	Inf24 h/Hyp24 h
lncRNA.6305.2	Down	Inf24 h/Hyp24 h
lncRNA.6581.1	Down	Inf24 h/Hyp24 h
lncRNA.6596.1	Down	Inf24 h/Hyp24 h
lncRNA.6596.3	Down	Inf24 h/Hyp24 h
lncRNA.6734.1	Down	Inf24 h/Hyp24 h
lncRNA.6957.1	Down	Inf24 h/Hyp24 h
lncRNA.7323.1	Down	Inf24 h/Hyp24 h
lncRNA.7752.1	Down	Inf24 h/Hyp24 h
lncRNA.7752.2	Down	Inf24 h/Hyp24 h
lncRNA.7789.1	Down	Inf24 h/Hyp24 h
lncRNA.7999.1	Down	Inf24 h/Hyp24 h
lncRNA.8316.2	Down	Inf24 h/Hyp24 h
lncRNA.8339.1	Down	Inf24 h/Hyp24 h
lncRNA.8783.3	Down	Inf24 h/Hyp24 h
lncRNA.9730.4	Down	Inf24 h/Hyp24 h
lncRNA.9756.1	Down	Inf24 h/Hyp24 h
lncRNA.9913.1	Down	Inf24 h/Hyp24 h
lncRNA.10475.1	Down	Inf24 h/Hyp24 h
lncRNA.10472.1	Down	Inf24 h/Hyp24 h
lncRNA.11011.2	Down	Inf24 h/Hyp24 h
lncRNA.11209.1	Down	Inf24 h/Hyp24 h
lncRNA.12258.2	Down	Inf24 h/Hyp24 h
lncRNA.12532.1	Down	Inf24 h/Hyp24 h
lncRNA.12666.1	Down	Inf24 h/Hyp24 h
lncRNA.13046.5	Down	Inf24 h/Hyp24 h
lncRNA.13049.1	Down	Inf24 h/Hyp24 h
lncRNA.13049.2	Down	Inf24 h/Hyp24 h
lncRNA.13148.1	Down	Inf24 h/Hyp24 h
lncRNA.13149.1	Down	Inf24 h/Hyp24 h
lncRNA.14278.1	Down	Inf24 h/Hyp24 h
lncRNA.14450.3	Down	Inf24 h/Hyp24 h
lncRNA.14825.1	Down	Inf24 h/Hyp24 h
lncRNA.14889.1	Down	Inf24 h/Hyp24 h
lncRNA.14982.1	Down	Inf24 h/Hyp24 h
lncRNA.15106.1	Down	Inf24 h/Hyp24 h
lncRNA.15106.3	Down	Inf24 h/Hyp24 h
lncRNA.15157.5	Down	Inf24 h/Hyp24 h
lncRNA.15157.6	Down	Inf24 h/Hyp24 h
lncRNA.15157.7	Down	Inf24 h/Hyp24 h
lncRNA.15473.2	Down	Inf24 h/Hyp24 h
lncRNA.15617.1	Down	Inf24 h/Hyp24 h
lncRNA.15667.4	Down	Inf24 h/Hyp24 h
lncRNA.15781.1	Down	Inf24 h/Hyp24 h
lncRNA.16782.1	Down	Inf24 h/Hyp24 h
lncRNA.17058.1	Down	Inf24 h/Hyp24 h
lncRNA.17058.2	Down	Inf24 h/Hyp24 h
lncRNA.1.1	Up	Inf48 h/Hyp48 h
lncRNA.973.4	Up	Inf48 h/Hyp48 h
lncRNA.1687.1	Up	Inf48 h/Hyp48 h
lncRNA.1825.1	Up	Inf48 h/Hyp48 h
lncRNA.2297.4	Up	Inf48 h/Hyp48 h
lncRNA.2378.2	Up	Inf48 h/Hyp48 h
lncRNA.2412.3	Up	Inf48 h/Hyp48 h
lncRNA.3174.1	Up	Inf48 h/Hyp48 h
lncRNA.3344.1	Up	Inf48 h/Hyp48 h
lncRNA.3424.1	Up	Inf48 h/Hyp48 h
lncRNA.3425.1	Up	Inf48 h/Hyp48 h
lncRNA.3425.2	Up	Inf48 h/Hyp48 h
lncRNA.4091.1	Up	Inf48 h/Hyp48 h
lncRNA.4489.2	Up	Inf48 h/Hyp48 h
lncRNA.5128.4	Up	Inf48 h/Hyp48 h
lncRNA.5343.1	Up	Inf48 h/Hyp48 h
lncRNA.5607.2	Up	Inf48 h/Hyp48 h
lncRNA.5614.4	Up	Inf48 h/Hyp48 h
lncRNA.5630.3	Up	Inf48 h/Hyp48 h
lncRNA.5919.1	Up	Inf48 h/Hyp48 h
lncRNA.6687.1	Up	Inf48 h/Hyp48 h
lncRNA.6940.1	Up	Inf48 h/Hyp48 h
lncRNA.7169.1	Up	Inf48 h/Hyp48 h
lncRNA.7187.1	Up	Inf48 h/Hyp48 h
lncRNA.7333.1	Up	Inf48 h/Hyp48 h
lncRNA.7752.3	Up	Inf48 h/Hyp48 h
lncRNA.7848.2	Up	Inf48 h/Hyp48 h
lncRNA.8086.1	Up	Inf48 h/Hyp48 h
lncRNA.8113.4	Up	Inf48 h/Hyp48 h
lncRNA.11214.1	Up	Inf48 h/Hyp48 h
lncRNA.11452.1	Up	Inf48 h/Hyp48 h
lncRNA.11486.1	Up	Inf48 h/Hyp48 h
lncRNA.11509.1	Up	Inf48 h/Hyp48 h
lncRNA.12071.2	Up	Inf48 h/Hyp48 h
lncRNA.12461.3	Up	Inf48 h/Hyp48 h
lncRNA.12848.4	Up	Inf48 h/Hyp48 h
lncRNA.13232.1	Up	Inf48 h/Hyp48 h
lncRNA.13426.1	Up	Inf48 h/Hyp48 h
lncRNA.13751.1	Up	Inf48 h/Hyp48 h
lncRNA.14364.3	Up	Inf48 h/Hyp48 h
lncRNA.14364.4	Up	Inf48 h/Hyp48 h
lncRNA.14982.2	Up	Inf48 h/Hyp48 h
lncRNA.15106.3	Up	Inf48 h/Hyp48 h
lncRNA.15105.3	Up	Inf48 h/Hyp48 h
lncRNA.15202.1	Up	Inf48 h/Hyp48 h
lncRNA.15395.3	Up	Inf48 h/Hyp48 h
lncRNA.15588.2	Up	Inf48 h/Hyp48 h
lncRNA.15588.8	Up	Inf48 h/Hyp48 h
lncRNA.15701.2	Up	Inf48 h/Hyp48 h
lncRNA.15761.3	Up	Inf48 h/Hyp48 h
lncRNA.16279.2	Up	Inf48 h/Hyp48 h
lncRNA.16705.1	Up	Inf48 h/Hyp48 h
lncRNA.79.1	Down	Inf48 h/Hyp48 h
lncRNA.79.3	Down	Inf48 h/Hyp48 h
lncRNA.343.1	Down	Inf48 h/Hyp48 h
lncRNA.503.1	Down	Inf48 h/Hyp48 h
lncRNA.587.1	Down	Inf48 h/Hyp48 h
lncRNA.638.2	Down	Inf48 h/Hyp48 h
lncRNA.739.1	Down	Inf48 h/Hyp48 h
lncRNA.739.3	Down	Inf48 h/Hyp48 h
lncRNA.854.1	Down	Inf48 h/Hyp48 h
lncRNA.921.1	Down	Inf48 h/Hyp48 h
lncRNA.979.2	Down	Inf48 h/Hyp48 h
lncRNA.1084.1	Down	Inf48 h/Hyp48 h
lncRNA.1156.1	Down	Inf48 h/Hyp48 h
lncRNA.1156.3	Down	Inf48 h/Hyp48 h
lncRNA.1125.1	Down	Inf48 h/Hyp48 h
lncRNA.1226.1	Down	Inf48 h/Hyp48 h
lncRNA.1408.3	Down	Inf48 h/Hyp48 h
lncRNA.1656.1	Down	Inf48 h/Hyp48 h
lncRNA.1752.1	Down	Inf48 h/Hyp48 h
lncRNA.1752.2	Down	Inf48 h/Hyp48 h
lncRNA.1752.3	Down	Inf48 h/Hyp48 h
lncRNA.1955.1	Down	Inf48 h/Hyp48 h
lncRNA.1985.1	Down	Inf48 h/Hyp48 h
lncRNA.2050.1	Down	Inf48 h/Hyp48 h
lncRNA.2174.1	Down	Inf48 h/Hyp48 h
lncRNA.2174.5	Down	Inf48 h/Hyp48 h
lncRNA.2174.6	Down	Inf48 h/Hyp48 h
lncRNA.2184.1	Down	Inf48 h/Hyp48 h
lncRNA.2276.1	Down	Inf48 h/Hyp48 h
lncRNA.2281.3	Down	Inf48 h/Hyp48 h
lncRNA.2288.2	Down	Inf48 h/Hyp48 h
lncRNA.2402.2	Down	Inf48 h/Hyp48 h
lncRNA.2581.1	Down	Inf48 h/Hyp48 h
lncRNA.2586.2	Down	Inf48 h/Hyp48 h
lncRNA.2595.1	Down	Inf48 h/Hyp48 h
lncRNA.2605.1	Down	Inf48 h/Hyp48 h
lncRNA.2605.6	Down	Inf48 h/Hyp48 h
lncRNA.2604.2	Down	Inf48 h/Hyp48 h
lncRNA.2790.1	Down	Inf48 h/Hyp48 h
lncRNA.2862.1	Down	Inf48 h/Hyp48 h
lncRNA.2862.2	Down	Inf48 h/Hyp48 h
lncRNA.2961.1	Down	Inf48 h/Hyp48 h
lncRNA.2995.1	Down	Inf48 h/Hyp48 h
lncRNA.2995.3	Down	Inf48 h/Hyp48 h
lncRNA.2995.6	Down	Inf48 h/Hyp48 h
lncRNA.3234.1	Down	Inf48 h/Hyp48 h
lncRNA.3234.2	Down	Inf48 h/Hyp48 h
lncRNA.3477.1	Down	Inf48 h/Hyp48 h
lncRNA.3641.2	Down	Inf48 h/Hyp48 h
lncRNA.3640.1	Down	Inf48 h/Hyp48 h
lncRNA.3874.1	Down	Inf48 h/Hyp48 h
lncRNA.3956.2	Down	Inf48 h/Hyp48 h
lncRNA.4201.4	Down	Inf48 h/Hyp48 h
lncRNA.4365.2	Down	Inf48 h/Hyp48 h
lncRNA.4451.1	Down	Inf48 h/Hyp48 h
lncRNA.4452.3	Down	Inf48 h/Hyp48 h
lncRNA.4866.1	Down	Inf48 h/Hyp48 h
lncRNA.4917.2	Down	Inf48 h/Hyp48 h
lncRNA.4922.1	Down	Inf48 h/Hyp48 h
lncRNA.4922.4	Down	Inf48 h/Hyp48 h
lncRNA.4922.7	Down	Inf48 h/Hyp48 h
lncRNA.4939.1	Down	Inf48 h/Hyp48 h
lncRNA.4939.5	Down	Inf48 h/Hyp48 h
lncRNA.5199.2	Down	Inf48 h/Hyp48 h
lncRNA.5199.3	Down	Inf48 h/Hyp48 h
lncRNA.5297.1	Down	Inf48 h/Hyp48 h
lncRNA.5385.1	Down	Inf48 h/Hyp48 h
lncRNA.5485.5	Down	Inf48 h/Hyp48 h
lncRNA.5614.1	Down	Inf48 h/Hyp48 h
lncRNA.5614.6	Down	Inf48 h/Hyp48 h
lncRNA.5630.1	Down	Inf48 h/Hyp48 h
lncRNA.5630.2	Down	Inf48 h/Hyp48 h
lncRNA.5868.1	Down	Inf48 h/Hyp48 h
lncRNA.5985.3	Down	Inf48 h/Hyp48 h
lncRNA.6008.2	Down	Inf48 h/Hyp48 h
lncRNA.6008.3	Down	Inf48 h/Hyp48 h
lncRNA.6008.4	Down	Inf48 h/Hyp48 h
lncRNA.6011.1	Down	Inf48 h/Hyp48 h
lncRNA.6027.3	Down	Inf48 h/Hyp48 h
lncRNA.6026.1	Down	Inf48 h/Hyp48 h
lncRNA.6055.2	Down	Inf48 h/Hyp48 h
lncRNA.6097.3	Down	Inf48 h/Hyp48 h
lncRNA.6127.4	Down	Inf48 h/Hyp48 h
lncRNA.6239.1	Down	Inf48 h/Hyp48 h
lncRNA.6245.1	Down	Inf48 h/Hyp48 h
lncRNA.6255.4	Down	Inf48 h/Hyp48 h
lncRNA.6273.1	Down	Inf48 h/Hyp48 h
lncRNA.6305.1	Down	Inf48 h/Hyp48 h
lncRNA.6305.2	Down	Inf48 h/Hyp48 h
lncRNA.6321.1	Down	Inf48 h/Hyp48 h
lncRNA.6404.1	Down	Inf48 h/Hyp48 h
lncRNA.6410.1	Down	Inf48 h/Hyp48 h
lncRNA.6581.1	Down	Inf48 h/Hyp48 h
lncRNA.6596.1	Down	Inf48 h/Hyp48 h
lncRNA.6596.3	Down	Inf48 h/Hyp48 h
lncRNA.6734.1	Down	Inf48 h/Hyp48 h
lncRNA.6776.1	Down	Inf48 h/Hyp48 h
lncRNA.6957.1	Down	Inf48 h/Hyp48 h
lncRNA.6957.2	Down	Inf48 h/Hyp48 h
lncRNA.7020.1	Down	Inf48 h/Hyp48 h
lncRNA.7307.1	Down	Inf48 h/Hyp48 h
lncRNA.7323.1	Down	Inf48 h/Hyp48 h
lncRNA.7455.2	Down	Inf48 h/Hyp48 h
lncRNA.7490.1	Down	Inf48 h/Hyp48 h
lncRNA.7637.4	Down	Inf48 h/Hyp48 h
lncRNA.7635.1	Down	Inf48 h/Hyp48 h
lncRNA.7635.2	Down	Inf48 h/Hyp48 h
lncRNA.7752.1	Down	Inf48 h/Hyp48 h
lncRNA.7752.2	Down	Inf48 h/Hyp48 h
lncRNA.7789.1	Down	Inf48 h/Hyp48 h
lncRNA.7859.2	Down	Inf48 h/Hyp48 h
lncRNA.7999.1	Down	Inf48 h/Hyp48 h
lncRNA.8052.1	Down	Inf48 h/Hyp48 h
lncRNA.8113.2	Down	Inf48 h/Hyp48 h
lncRNA.8316.2	Down	Inf48 h/Hyp48 h
lncRNA.8339.1	Down	Inf48 h/Hyp48 h
lncRNA.8441.2	Down	Inf48 h/Hyp48 h
lncRNA.8533.2	Down	Inf48 h/Hyp48 h
lncRNA.8533.5	Down	Inf48 h/Hyp48 h
lncRNA.8571.1	Down	Inf48 h/Hyp48 h
lncRNA.8619.1	Down	Inf48 h/Hyp48 h
lncRNA.8637.2	Down	Inf48 h/Hyp48 h
lncRNA.8649.1	Down	Inf48 h/Hyp48 h
lncRNA.8783.3	Down	Inf48 h/Hyp48 h
lncRNA.8822.1	Down	Inf48 h/Hyp48 h
lncRNA.8822.3	Down	Inf48 h/Hyp48 h
lncRNA.8958.1	Down	Inf48 h/Hyp48 h
lncRNA.9730.4	Down	Inf48 h/Hyp48 h
lncRNA.9756.1	Down	Inf48 h/Hyp48 h
lncRNA.9887.1	Down	Inf48 h/Hyp48 h
lncRNA.10229.1	Down	Inf48 h/Hyp48 h
lncRNA.10429.2	Down	Inf48 h/Hyp48 h
lncRNA.10452.3	Down	Inf48 h/Hyp48 h
lncRNA.10475.1	Down	Inf48 h/Hyp48 h
lncRNA.10478.3	Down	Inf48 h/Hyp48 h
lncRNA.10673.1	Down	Inf48 h/Hyp48 h
lncRNA.10686.1	Down	Inf48 h/Hyp48 h
lncRNA.10739.2	Down	Inf48 h/Hyp48 h
lncRNA.10786.1	Down	Inf48 h/Hyp48 h
lncRNA.10905.4	Down	Inf48 h/Hyp48 h
lncRNA.11011.2	Down	Inf48 h/Hyp48 h
lncRNA.11209.1	Down	Inf48 h/Hyp48 h
lncRNA.11300.1	Down	Inf48 h/Hyp48 h
lncRNA.11694.1	Down	Inf48 h/Hyp48 h
lncRNA.11759.1	Down	Inf48 h/Hyp48 h
lncRNA.11946.5	Down	Inf48 h/Hyp48 h
lncRNA.12258.2	Down	Inf48 h/Hyp48 h
lncRNA.12504.1	Down	Inf48 h/Hyp48 h
lncRNA.12532.1	Down	Inf48 h/Hyp48 h
lncRNA.12532.2	Down	Inf48 h/Hyp48 h
lncRNA.12612.1	Down	Inf48 h/Hyp48 h
lncRNA.12666.2	Down	Inf48 h/Hyp48 h
lncRNA.12710.1	Down	Inf48 h/Hyp48 h
lncRNA.13009.1	Down	Inf48 h/Hyp48 h
lncRNA.13046.7	Down	Inf48 h/Hyp48 h
lncRNA.13049.1	Down	Inf48 h/Hyp48 h
lncRNA.13049.2	Down	Inf48 h/Hyp48 h
lncRNA.13049.3	Down	Inf48 h/Hyp48 h
lncRNA.13098.5	Down	Inf48 h/Hyp48 h
lncRNA.13137.2	Down	Inf48 h/Hyp48 h
lncRNA.13148.1	Down	Inf48 h/Hyp48 h
lncRNA.13149.1	Down	Inf48 h/Hyp48 h
lncRNA.13288.1	Down	Inf48 h/Hyp48 h
lncRNA.13664.1	Down	Inf48 h/Hyp48 h
lncRNA.13747.2	Down	Inf48 h/Hyp48 h
lncRNA.13842.1	Down	Inf48 h/Hyp48 h
lncRNA.13842.3	Down	Inf48 h/Hyp48 h
lncRNA.13906.1	Down	Inf48 h/Hyp48 h
lncRNA.14207.1	Down	Inf48 h/Hyp48 h
lncRNA.14271.4	Down	Inf48 h/Hyp48 h
lncRNA.14278.1	Down	Inf48 h/Hyp48 h
lncRNA.14288.1	Down	Inf48 h/Hyp48 h
lncRNA.14292.1	Down	Inf48 h/Hyp48 h
lncRNA.14450.4	Down	Inf48 h/Hyp48 h
lncRNA.14627.1	Down	Inf48 h/Hyp48 h
lncRNA.14664.5	Down	Inf48 h/Hyp48 h
lncRNA.14716.1	Down	Inf48 h/Hyp48 h
lncRNA.14716.2	Down	Inf48 h/Hyp48 h
lncRNA.14716.3	Down	Inf48 h/Hyp48 h
lncRNA.14716.5	Down	Inf48 h/Hyp48 h
lncRNA.14719.4	Down	Inf48 h/Hyp48 h
lncRNA.14729.5	Down	Inf48 h/Hyp48 h
lncRNA.14760.1	Down	Inf48 h/Hyp48 h
lncRNA.14800.1	Down	Inf48 h/Hyp48 h
lncRNA.14825.1	Down	Inf48 h/Hyp48 h
lncRNA.14949.1	Down	Inf48 h/Hyp48 h
lncRNA.14982.1	Down	Inf48 h/Hyp48 h
lncRNA.15061.1	Down	Inf48 h/Hyp48 h
lncRNA.15105.1	Down	Inf48 h/Hyp48 h
lncRNA.15106.1	Down	Inf48 h/Hyp48 h
lncRNA.15157.2	Down	Inf48 h/Hyp48 h
lncRNA.15157.3	Down	Inf48 h/Hyp48 h
lncRNA.15157.4	Down	Inf48 h/Hyp48 h
lncRNA.15157.5	Down	Inf48 h/Hyp48 h
lncRNA.15157.6	Down	Inf48 h/Hyp48 h
lncRNA.15157.7	Down	Inf48 h/Hyp48 h
lncRNA.15157.8	Down	Inf48 h/Hyp48 h
lncRNA.15176.3	Down	Inf48 h/Hyp48 h
lncRNA.15268.2	Down	Inf48 h/Hyp48 h
lncRNA.15337.3	Down	Inf48 h/Hyp48 h
lncRNA.15473.2	Down	Inf48 h/Hyp48 h
lncRNA.15617.1	Down	Inf48 h/Hyp48 h
lncRNA.15620.1	Down	Inf48 h/Hyp48 h
lncRNA.15632.2	Down	Inf48 h/Hyp48 h
lncRNA.15667.3	Down	Inf48 h/Hyp48 h
lncRNA.15667.4	Down	Inf48 h/Hyp48 h
lncRNA.15696.4	Down	Inf48 h/Hyp48 h
lncRNA.15761.2	Down	Inf48 h/Hyp48 h
lncRNA.15775.1	Down	Inf48 h/Hyp48 h
lncRNA.15781.1	Down	Inf48 h/Hyp48 h
lncRNA.15880.1	Down	Inf48 h/Hyp48 h
lncRNA.15921.1	Down	Inf48 h/Hyp48 h
lncRNA.16003.1	Down	Inf48 h/Hyp48 h
lncRNA.16117.1	Down	Inf48 h/Hyp48 h
lncRNA.16185.1	Down	Inf48 h/Hyp48 h
lncRNA.16251.1	Down	Inf48 h/Hyp48 h
lncRNA.16627.1	Down	Inf48 h/Hyp48 h
lncRNA.16715.1	Down	Inf48 h/Hyp48 h
lncRNA.16782.1	Down	Inf48 h/Hyp48 h
lncRNA.16859.1	Down	Inf48 h/Hyp48 h
lncRNA.16993.2	Down	Inf48 h/Hyp48 h
lncRNA.17058.2	Down	Inf48 h/Hyp48 h

## Sheet: Table S3
Table S3 The primer pairs used in this study.
Gene ID	Primer name/Type	Primer sequence
GAPDH	GAPDH-F/RT-qPCR	TGCCAAGAAGGTTGTTATC
GAPDH	GAPDH-R/RT-qPCR	TGTAGGTCTCGTTGTTGA
lncRNA.3956	Sample1-A-F/RT-qPCR	TAAACGCCGTAAGTGGCGGG
lncRNA.3956	Sample1-A-R/RT-qPCR	AGGCCGGAGAACAGTCCCTT
Bcin01g04940	Sample1-B-F/RT-qPCR	CTAGTACAGCCCGCCCAAGC
Bcin01g04940	Sample1-B-R/RT-qPCR	ACGGCCTTCACTGACAGCAC
lncRNA.9756	Sample2-A-F/RT-qPCR	AATCGCATACCATTCCGACACA
lncRNA.9756	Sample2-A-R/RT-qPCR	GTTTCTGTAGGTGGGTGGATGT
Bcin03g03060	Sample2-B-F/RT-qPCR	TTCCCCACGGTTGCTGGTTC
Bcin03g03060	Sample2-B-R/RT-qPCR	CCACTGCTTGAGCCAACCCA
lncRNA.739	Sample3-A-F/RT-qPCR	TATCGTCGCTTGCCACTGTCTC
lncRNA.739	Sample3-A-R/RT-qPCR	TGCTGGATAGTGATGCGGAAGT
Bcin12g02530	Sample3-B-F/RT-qPCR	CGAATGGCCGCCGATTACAAGA
Bcin12g02530	Sample3-B-R/RT-qPCR	TTGCTGCTGCTGCTGCTGTT
lncRNA.3649	IR-F/RT-PCR	GAATTGCTAGTATCTCTGAAGAG
lncRNA.3649	IR-R/RT-PCR	GTTCGCTCCTATGCTTCAGTAGA
